# Supplementary material for: Prescribing of Clozapine and Antipsychotic Polypharmacy for Schizophrenia in a Large Medicaid Program
Source: Atypon-hosted journal article supplement (doi:10.1176/appi.ps.201600041), 2017-02-15
Supplement: appi.ps.201600041.ds001.pdf [file appi.ps.201600041.ds001.pdf]

**Online Supplement**

**Appendix Figure. Flow chart for the study sample**

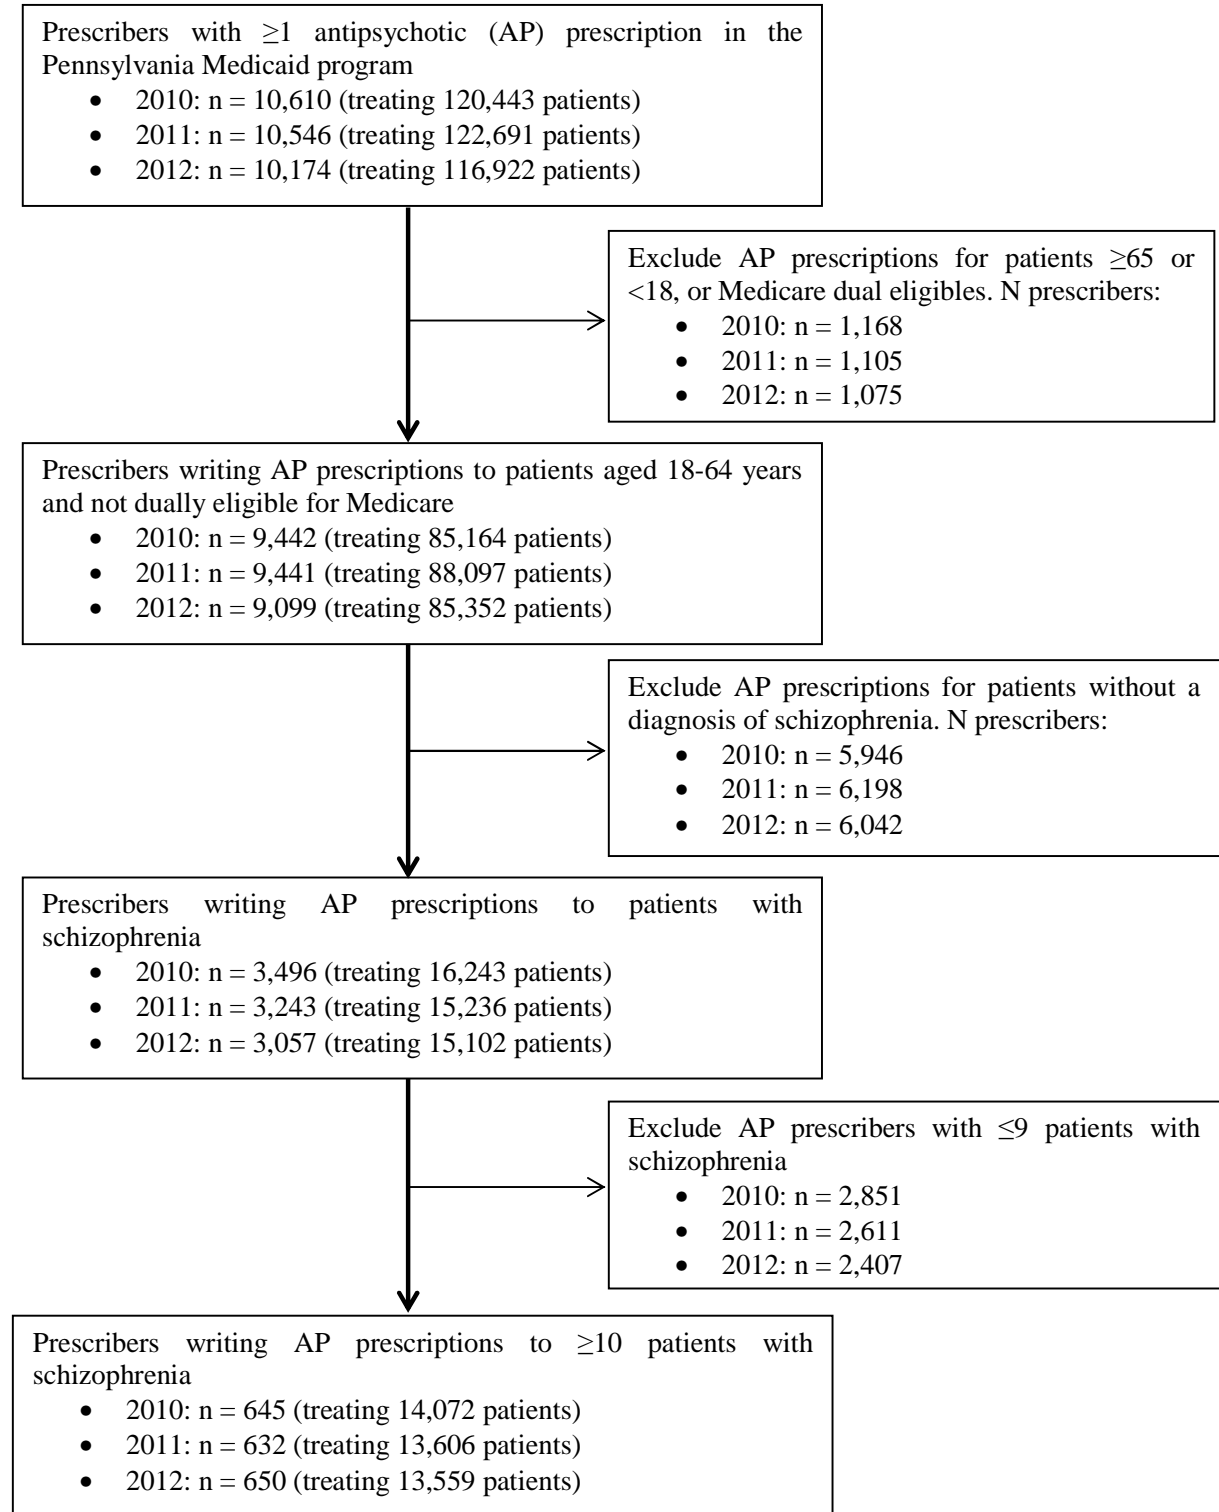

**Appendix Table 1. ICD-9 codes for several comorbidities**

| <b>Diagnosis</b>                       | <b>ICD-9 codes</b>                            |
|----------------------------------------|-----------------------------------------------|
| Affective disorders                    | 296, 300.4, 301.13, 309.1, 311                |
| Anxiety disorders                      | 300.0, 309.81, 300.2, 300.3                   |
| Other psychiatric disorders            | 307.1, 307.50, 307.51, 314                    |
| Substance use disorders                | 291, 292, 303, 304, 305.0, 305.2-305.7, 305.9 |
| Brain/cognitive impairment comorbidity | 331, 797, 290, 294, 310, 317-319              |

**Appendix Table 2. Prescribers' clozapine and polypharmacy practices by their patient caseloads with schizophrenia-related hospitalization (quartiles), 2010-2012**

| Share of patient caseloads with schizophrenia-related hospitalization | Any clozapine prescribing, % | Any polypharmacy prescribing, % | Share of patients w/ clozapine use, % (M±SD) | Share of patients w/ polypharmacy use, % (M±SD) |
|-----------------------------------------------------------------------|------------------------------|---------------------------------|----------------------------------------------|-------------------------------------------------|
| <i>Year 2010</i>                                                      |                              |                                 |                                              |                                                 |
| 1st quartile (0.0-24.7%)                                              | 46                           | 61                              | 5±7                                          | 7±8                                             |
| 2nd quartile (25.0-36.0%)                                             | 60                           | 67                              | 7±12                                         | 8±8                                             |
| 3rd quartile (36.1-53.3%)                                             | 58                           | 69                              | 7±9                                          | 7±8                                             |
| 4th quartile (53.8-100.0%)                                            | 60                           | 29                              | 5±7                                          | 2±4                                             |
| <i>Year 2011</i>                                                      |                              |                                 |                                              |                                                 |
| 1st quartile (0.0-25.6%)                                              | 58                           | 77                              | 7±10                                         | 9±9                                             |
| 2nd quartile (25.8-38.5%)                                             | 68                           | 76                              | 9±12                                         | 10±9                                            |
| 3rd quartile (38.9-61.1%)                                             | 59                           | 61                              | 7±11                                         | 7±8                                             |
| 4th quartile (61.4-100.0%)                                            | 56                           | 24                              | 5±8                                          | 2±4                                             |
| <i>Year 2012</i>                                                      |                              |                                 |                                              |                                                 |
| 1st quartile (0.0-25.0%)                                              | 61                           | 73                              | 9±12                                         | 10±9                                            |
| 2nd quartile (25.5-37.3%)                                             | 63                           | 75                              | 7±10                                         | 9±8                                             |
| 3rd quartile (37.5-60.0%)                                             | 60                           | 63                              | 6±10                                         | 8±9                                             |
| 4th quartile (60.7-100.0%)                                            | 57                           | 20                              | 5±6                                          | 2±5                                             |
